# Supplementary material
Source: Research Square preprint supplement (doi:10.21203/rs.3.rs-9456072/v1)
Supplement: Supplementary file 1 [file a5023546524b206a9694974d.pdf]

## Supplementary Materials

### Thermodynamic Surface Characterization of Sustainable Polymers by Advanced Inverse Gas Chromatography Revealing Nonlinear Lewis Acid–Base Interactions for Environmental and Biomedical Applications

Tayssir Hamieh <sup>a,b,c\*</sup>,

<sup>a</sup> Faculty of Science and Engineering, Maastricht University, P.O. Box 616, 6200 MD Maastricht, The Netherlands, Email: [t.hamieh@maastrichtuniversity.nl](mailto:t.hamieh@maastrichtuniversity.nl)

<sup>b</sup> Institut de Science des Matériaux de Mulhouse, Université de Haute-Alsace, CNRS, IS2M UMR 7361, F-68100 Mulhouse, France

<sup>c</sup> Laboratory of Materials, Catalysis, Environment and Analytical Methods Laboratory (MCEMA), and LEDDAR Laboratory, Lebanese University, Hadath, Lebanon.

\* Correspondence: [t.hamieh@maastrichtuniversity.nl](mailto:t.hamieh@maastrichtuniversity.nl).

**Table S1.** Variations of London dispersive free energy  $\Delta G_a^d(T)$  (in kJ/mol) of PLA and CA as a function of temperature.

|           | PLA    |        |        |        |        |        |        |        |
|-----------|--------|--------|--------|--------|--------|--------|--------|--------|
| Solvents  | 303.15 | 308.15 | 313.15 | 318.15 | 323.15 | 328.15 | 333.15 | 338.15 |
| n-Pentane | 17.936 | 18.121 | 18.326 | 18.467 | 18.607 | 18.835 | 19.043 | 19.228 |
| n-Hexane  | 22.972 | 23.104 | 23.229 | 23.383 | 23.536 | 23.646 | 23.761 | 23.893 |
| n-Heptane | 28.124 | 28.232 | 28.350 | 28.454 | 28.558 | 28.670 | 28.772 | 28.880 |
| n-Octane  | 32.846 | 32.956 | 33.067 | 33.182 | 33.297 | 33.402 | 33.506 | 33.616 |
| n-Nonane  | 37.223 | 37.331 | 37.440 | 37.540 | 37.639 | 37.754 | 37.868 | 37.976 |
| CCl4      | 18.843 | 18.992 | 19.154 | 19.286 | 19.426 | 19.583 | 19.736 | 19.885 |

|                                 |        |        |        |        |        |        |        |        |
|---------------------------------|--------|--------|--------|--------|--------|--------|--------|--------|
| Nitromethane                    | 16.984 | 17.171 | 17.377 | 17.537 | 17.701 | 17.911 | 18.108 | 18.295 |
| CH <sub>2</sub> Cl <sub>2</sub> | 16.943 | 17.132 | 17.339 | 17.499 | 17.664 | 17.875 | 18.072 | 18.261 |
| Chloroform                      | 17.800 | 17.971 | 18.158 | 18.305 | 18.458 | 18.645 | 18.823 | 18.993 |
| Diethyl ether                   | 17.667 | 17.840 | 18.031 | 18.180 | 18.335 | 18.526 | 18.706 | 18.880 |
| THF                             | 17.056 | 17.241 | 17.446 | 17.604 | 17.768 | 17.976 | 18.171 | 18.357 |
| Ethyl acetate                   | 17.645 | 17.819 | 18.010 | 18.159 | 18.315 | 18.506 | 18.687 | 18.861 |
| Acetone                         | 16.256 | 16.459 | 16.682 | 16.852 | 17.027 | 17.257 | 17.471 | 17.673 |
| Acetonitrile                    | 15.614 | 15.830 | 16.069 | 16.248 | 16.431 | 16.679 | 16.908 | 17.124 |
| Toluene                         | 18.525 | 18.681 | 18.851 | 18.987 | 19.131 | 19.298 | 19.458 | 19.613 |
| Benzene                         | 18.001 | 18.167 | 18.350 | 18.494 | 18.645 | 18.826 | 18.999 | 19.165 |
| Methanol                        | 14.897 | 15.127 | 15.383 | 15.573 | 15.765 | 16.034 | 16.280 | 16.511 |
| Ethanol                         | 15.613 | 15.829 | 16.068 | 16.247 | 16.430 | 16.678 | 16.908 | 17.123 |
| Cyclohexane                     | 18.484 | 18.640 | 18.811 | 18.948 | 19.092 | 19.260 | 19.421 | 19.578 |
| Trichloroethylene               | 17.914 | 18.083 | 18.267 | 18.412 | 18.564 | 18.748 | 18.923 | 19.091 |
| Tetrachloroethylene             | 17.914 | 18.083 | 18.267 | 18.412 | 18.564 | 18.748 | 18.923 | 19.091 |
| <b>Cellulose acrylate</b>       |        |        |        |        |        |        |        |        |
| Solvents                        | 303.15 | 308.15 | 313.15 | 318.15 | 323.15 | 328.15 | 333.15 | 338.15 |
| n-Pentane                       | 12.774 | 12.951 | 13.178 | 13.222 | 13.495 | 13.680 | 13.841 | 14.005 |
| n-Hexane                        | 16.096 | 16.109 | 16.140 | 16.071 | 16.229 | 16.135 | 16.181 | 16.187 |
| n-Heptane                       | 19.545 | 19.356 | 19.270 | 18.893 | 18.644 | 18.729 | 18.416 | 18.218 |
| n-Octane                        | 22.810 | 22.433 | 22.174 | 21.569 | 21.160 | 21.059 | 20.545 | 20.167 |
| n-Nonane                        | 26.187 | 25.672 | 25.194 | 24.592 | 24.112 | 23.638 | 23.096 | 22.582 |
| CCl <sub>4</sub>                | 15.658 | 15.687 | 15.766 | 15.652 | 15.748 | 15.818 | 15.813 | 15.826 |
| Nitromethane                    | 8.276  | 8.694  | 9.147  | 9.440  | 9.993  | 10.353 | 10.782 | 11.180 |
| CH <sub>2</sub> Cl <sub>2</sub> | 8.119  | 8.546  | 9.007  | 9.308  | 9.871  | 10.237 | 10.676 | 11.082 |
| Chloroform                      | 11.520 | 11.766 | 12.056 | 12.169 | 12.522 | 12.754 | 12.993 | 13.222 |
| Diethyl ether                   | 10.960 | 11.237 | 11.554 | 11.699 | 12.086 | 12.340 | 12.612 | 12.870 |
| THF                             | 8.536  | 8.940  | 9.380  | 9.658  | 10.196 | 10.545 | 10.959 | 11.344 |
| Ethyl acetate                   | 10.882 | 11.163 | 11.484 | 11.632 | 12.025 | 12.282 | 12.558 | 12.820 |
| Acetone                         | 7.375  | 7.947  | 8.546  | 8.999  | 9.732  | 10.205 | 10.806 | 11.355 |
| Acetonitrile                    | 7.852  | 8.557  | 9.285  | 9.876  | 10.766 | 11.338 | 12.087 | 12.767 |

|                     |        |        |        |        |        |        |        |        |
|---------------------|--------|--------|--------|--------|--------|--------|--------|--------|
| Toluene             | 14.344 | 14.442 | 14.588 | 14.546 | 14.723 | 14.845 | 14.917 | 14.999 |
| Benzene             | 12.277 | 12.484 | 12.735 | 12.806 | 13.112 | 13.315 | 13.509 | 13.698 |
| Methanol            | 7.996  | 8.852  | 9.723  | 10.472 | 11.539 | 12.223 | 13.141 | 13.970 |
| Ethanol             | 8.835  | 9.541  | 10.269 | 10.861 | 11.752 | 12.325 | 13.075 | 13.757 |
| Cyclohexane         | 14.201 | 14.306 | 14.460 | 14.425 | 14.612 | 14.739 | 14.820 | 14.909 |
| Trichloroethylene   | 11.938 | 12.163 | 12.431 | 12.521 | 12.848 | 13.064 | 13.278 | 13.485 |
| Tetrachloroethylene | 15.803 | 15.824 | 15.896 | 15.773 | 15.860 | 15.925 | 15.911 | 15.917 |

**Table S2.** Variations of polar free energy  $\Delta G_a^p(T)$  (in kJ/mol) of PLA and cellulose acrylate as a function of temperature.

| PLA                 |        |        |        |        |        |        |        |        |
|---------------------|--------|--------|--------|--------|--------|--------|--------|--------|
| Solvents            | 303.15 | 308.15 | 313.15 | 318.15 | 323.15 | 328.15 | 333.15 | 338.15 |
| CCl4                | 1.925  | 1.828  | 1.731  | 1.634  | 1.537  | 1.440  | 1.343  | 1.246  |
| Nitromethane        | 13.400 | 12.725 | 12.050 | 11.376 | 10.701 | 10.026 | 9.351  | 8.677  |
| CH2Cl2              | 11.002 | 10.331 | 9.661  | 8.990  | 8.320  | 7.649  | 6.979  | 6.308  |
| Chloroform          | 15.651 | 14.863 | 14.074 | 13.286 | 12.497 | 11.709 | 10.920 | 10.132 |
| Diethyl ether       | 11.305 | 10.738 | 10.170 | 9.603  | 9.035  | 8.468  | 7.900  | 7.333  |
| THF                 | 9.732  | 9.266  | 8.801  | 8.335  | 7.870  | 7.404  | 6.939  | 6.473  |
| Ethyl acetate       | 4.397  | 3.860  | 3.323  | 2.786  | 2.249  | 1.712  | 1.175  | 0.638  |
| Acetone             | 5.637  | 5.371  | 5.105  | 4.839  | 4.573  | 4.307  | 4.041  | 3.775  |
| Acetonitrile        | 18.933 | 17.980 | 17.028 | 16.076 | 15.124 | 14.171 | 13.219 | 12.267 |
| Toluene             | 10.359 | 10.018 | 9.677  | 9.336  | 8.995  | 8.654  | 8.313  | 7.972  |
| Benzene             | 0.540  | 0.513  | 0.485  | 0.458  | 0.431  | 0.404  | 0.377  | 0.349  |
| Methanol            | 40.830 | 39.913 | 38.996 | 38.078 | 37.161 | 36.244 | 35.327 | 34.409 |
| Ethanol             | 29.396 | 28.629 | 27.862 | 27.095 | 26.328 | 25.561 | 24.794 | 24.027 |
| Cyclohexane         | 2.967  | 2.818  | 2.668  | 2.519  | 2.369  | 2.220  | 2.070  | 1.921  |
| Trichloroethylene   | 2.376  | 2.256  | 2.136  | 2.017  | 1.897  | 1.778  | 1.658  | 1.538  |
| Tetrachloroethylene | 3.072  | 2.917  | 2.763  | 2.608  | 2.454  | 2.299  | 2.144  | 1.990  |
| Cellulose acrylate  |        |        |        |        |        |        |        |        |
| Solvents            | 303.15 | 308.15 | 313.15 | 318.15 | 323.15 | 328.15 | 333.15 | 338.15 |

|                     |        |        |        |        |        |        |        |        |
|---------------------|--------|--------|--------|--------|--------|--------|--------|--------|
| CCl4                | 6.894  | 6.823  | 6.752  | 6.681  | 6.610  | 6.539  | 6.468  | 6.398  |
| Nitromethane        | 7.961  | 6.840  | 5.719  | 4.598  | 3.477  | 2.356  | 1.235  | 0.114  |
| CH2Cl2              | 36.353 | 35.841 | 35.329 | 34.816 | 34.304 | 33.791 | 33.279 | 32.766 |
| Chloroform          | 9.266  | 9.003  | 8.740  | 8.477  | 8.214  | 7.951  | 7.688  | 7.425  |
| Diethyl ether       | 11.996 | 11.424 | 10.852 | 10.280 | 9.708  | 9.136  | 8.564  | 7.992  |
| THF                 | 15.084 | 14.710 | 14.335 | 13.961 | 13.586 | 13.212 | 12.837 | 12.463 |
| Ethyl acetate       | 18.478 | 17.949 | 17.420 | 16.890 | 16.361 | 15.832 | 15.303 | 14.774 |
| Acetone             | 39.244 | 38.650 | 38.056 | 37.462 | 36.868 | 36.274 | 35.680 | 35.086 |
| Acetonitrile        | 47.955 | 47.282 | 46.609 | 45.937 | 45.264 | 44.591 | 43.919 | 43.246 |
| Toluene             | 15.987 | 15.686 | 15.384 | 15.083 | 14.781 | 14.480 | 14.178 | 13.877 |
| Benzene             | 1.829  | 1.809  | 1.789  | 1.768  | 1.748  | 1.727  | 1.707  | 1.687  |
| Methanol            | 72.172 | 71.461 | 70.750 | 70.039 | 69.328 | 68.617 | 67.905 | 67.194 |
| Ethanol             | 54.951 | 54.331 | 53.712 | 53.093 | 52.474 | 51.855 | 51.235 | 50.616 |
| Cyclohexane         | 10.421 | 10.309 | 10.197 | 10.085 | 9.973  | 9.861  | 9.749  | 9.637  |
| Trichloroethylene   | 7.697  | 7.605  | 7.514  | 7.422  | 7.330  | 7.238  | 7.147  | 7.055  |
| Tetrachloroethylene | 10.235 | 10.124 | 10.014 | 9.903  | 9.793  | 9.683  | 9.572  | 9.462  |

**Table S3.** Variations of the separation distance  $r(T)$  between solvents and polymer surfaces as a function of temperature.

| PLA             |        |        |        |        |        |        |        |        |
|-----------------|--------|--------|--------|--------|--------|--------|--------|--------|
| Temperature (K) | 303.15 | 308.15 | 313.15 | 318.15 | 323.15 | 328.15 | 333.15 | 338.15 |
| n-Pentane       | 5.737  | 5.727  | 5.717  | 5.709  | 5.702  | 5.691  | 5.680  | 5.671  |
| n-Hexane        | 5.661  | 5.655  | 5.650  | 5.644  | 5.638  | 5.633  | 5.629  | 5.624  |
| n-Heptane       | 5.587  | 5.583  | 5.579  | 5.576  | 5.572  | 5.569  | 5.566  | 5.562  |
| n-Octane        | 5.580  | 5.577  | 5.574  | 5.571  | 5.568  | 5.565  | 5.562  | 5.559  |
| n-Nonane        | 5.541  | 5.538  | 5.536  | 5.533  | 5.531  | 5.528  | 5.525  | 5.523  |
| CCl4            | 5.825  | 5.817  | 5.809  | 5.802  | 5.795  | 5.787  | 5.780  | 5.773  |
| Nitromethane    | 5.540  | 5.530  | 5.519  | 5.510  | 5.502  | 5.491  | 5.481  | 5.472  |
| CH2Cl2          | 5.532  | 5.522  | 5.511  | 5.502  | 5.494  | 5.483  | 5.473  | 5.463  |

|                     |       |       |       |       |       |       |       |       |
|---------------------|-------|-------|-------|-------|-------|-------|-------|-------|
| Chloroform          | 5.681 | 5.672 | 5.662 | 5.655 | 5.647 | 5.637 | 5.628 | 5.620 |
| Diethyl ether       | 5.660 | 5.651 | 5.641 | 5.633 | 5.625 | 5.616 | 5.606 | 5.598 |
| THF                 | 5.554 | 5.544 | 5.533 | 5.524 | 5.516 | 5.505 | 5.495 | 5.486 |
| Ethyl acetate       | 5.657 | 5.647 | 5.637 | 5.630 | 5.622 | 5.612 | 5.603 | 5.594 |
| Acetone             | 5.382 | 5.371 | 5.359 | 5.350 | 5.341 | 5.329 | 5.318 | 5.308 |
| Acetonitrile        | 5.205 | 5.193 | 5.180 | 5.171 | 5.161 | 5.148 | 5.137 | 5.126 |
| Toluene             | 5.784 | 5.776 | 5.768 | 5.761 | 5.753 | 5.745 | 5.737 | 5.730 |
| Benzene             | 5.711 | 5.703 | 5.693 | 5.686 | 5.678 | 5.669 | 5.660 | 5.652 |
| Methanol            | 4.938 | 4.926 | 4.912 | 4.902 | 4.892 | 4.878 | 4.866 | 4.855 |
| Ethanol             | 5.205 | 5.193 | 5.180 | 5.171 | 5.161 | 5.148 | 5.136 | 5.126 |
| Cyclohexane         | 5.779 | 5.771 | 5.762 | 5.755 | 5.748 | 5.739 | 5.731 | 5.724 |
| Trichloroethylene   | 5.699 | 5.690 | 5.680 | 5.673 | 5.665 | 5.656 | 5.647 | 5.638 |
| Tetrachloroethylene | 5.882 | 5.873 | 5.863 | 5.855 | 5.847 | 5.838 | 5.829 | 5.820 |

**Cellulose acrylate**

|                                 |        |        |        |        |        |        |        |        |
|---------------------------------|--------|--------|--------|--------|--------|--------|--------|--------|
| Solvents                        | 303.15 | 308.15 | 313.15 | 318.15 | 323.15 | 328.15 | 333.15 | 338.15 |
| n-Pentane                       | 6.607  | 6.589  | 6.566  | 6.562  | 6.536  | 6.518  | 6.504  | 6.489  |
| n-Hexane                        | 6.495  | 6.494  | 6.492  | 6.497  | 6.485  | 6.492  | 6.489  | 6.488  |
| n-Heptane                       | 6.393  | 6.404  | 6.409  | 6.433  | 6.449  | 6.444  | 6.464  | 6.477  |
| n-Octane                        | 6.369  | 6.388  | 6.402  | 6.434  | 6.457  | 6.463  | 6.492  | 6.515  |
| n-Nonane                        | 6.297  | 6.320  | 6.341  | 6.369  | 6.392  | 6.415  | 6.442  | 6.469  |
| CCl <sub>4</sub>                | 6.502  | 6.500  | 6.493  | 6.502  | 6.495  | 6.489  | 6.490  | 6.489  |
| Nitromethane                    | 6.918  | 6.844  | 6.770  | 6.725  | 6.645  | 6.597  | 6.542  | 6.493  |
| CH <sub>2</sub> Cl <sub>2</sub> | 6.935  | 6.858  | 6.781  | 6.733  | 6.650  | 6.600  | 6.543  | 6.494  |
| Chloroform                      | 6.671  | 6.643  | 6.611  | 6.598  | 6.561  | 6.537  | 6.513  | 6.491  |
| Diethyl ether                   | 6.704  | 6.670  | 6.632  | 6.616  | 6.573  | 6.545  | 6.517  | 6.491  |
| THF                             | 6.892  | 6.823  | 6.754  | 6.712  | 6.637  | 6.591  | 6.539  | 6.493  |
| Ethyl acetate                   | 6.708  | 6.674  | 6.635  | 6.618  | 6.574  | 6.547  | 6.518  | 6.491  |
| Acetone                         | 6.846  | 6.731  | 6.624  | 6.551  | 6.443  | 6.380  | 6.305  | 6.242  |
| Acetonitrile                    | 6.486  | 6.365  | 6.254  | 6.173  | 6.064  | 6.000  | 5.924  | 5.860  |
| Toluene                         | 6.545  | 6.537  | 6.524  | 6.528  | 6.512  | 6.502  | 6.496  | 6.489  |

|                     |       |       |       |       |       |       |       |       |
|---------------------|-------|-------|-------|-------|-------|-------|-------|-------|
| Benzene             | 6.632 | 6.610 | 6.584 | 6.577 | 6.546 | 6.526 | 6.508 | 6.490 |
| Methanol            | 6.080 | 5.946 | 5.829 | 5.740 | 5.627 | 5.563 | 5.484 | 5.418 |
| Ethanol             | 6.319 | 6.216 | 6.121 | 6.051 | 5.955 | 5.899 | 5.830 | 5.773 |
| Cyclohexane         | 6.551 | 6.541 | 6.528 | 6.531 | 6.514 | 6.504 | 6.497 | 6.489 |
| Trichloroethylene   | 6.649 | 6.624 | 6.596 | 6.586 | 6.553 | 6.531 | 6.510 | 6.491 |
| Tetrachloroethylene | 6.497 | 6.496 | 6.490 | 6.500 | 6.493 | 6.488 | 6.489 | 6.488 |

**Table S4.** Variations of the surface area ( $\text{\AA}^2$ ) of adsorbed solvents on zeolite surfaces as a function temperature for PLA and CA.

| PLA           |        |        |        |        |        |        |        |        |
|---------------|--------|--------|--------|--------|--------|--------|--------|--------|
| Solvents      | 303.15 | 308.15 | 313.15 | 318.15 | 323.15 | 328.15 | 333.15 | 338.15 |
| n-Pentane     | 41.0   | 42.5   | 44.1   | 45.6   | 47.2   | 49.2   | 51.2   | 53.3   |
| n-Hexane      | 48.8   | 50.1   | 51.4   | 52.9   | 54.5   | 56.0   | 57.7   | 59.4   |
| n-Heptane     | 56.8   | 58.1   | 59.5   | 60.9   | 62.3   | 63.9   | 65.5   | 67.2   |
| n-Octane      | 63.9   | 65.2   | 66.6   | 68.1   | 69.6   | 71.1   | 72.8   | 74.5   |
| n-Nonane      | 70.2   | 71.6   | 73.0   | 74.4   | 76.0   | 77.6   | 79.2   | 81.0   |
| CCl4          | 33.0   | 33.9   | 34.8   | 35.6   | 36.5   | 37.5   | 38.5   | 39.6   |
| Nitromethane  | 30.0   | 31.0   | 32.1   | 33.2   | 34.3   | 35.6   | 37.0   | 38.4   |
| CH2 Cl2       | 28.9   | 29.8   | 30.7   | 31.7   | 32.6   | 33.8   | 34.9   | 36.1   |
| Chloroform    | 30.7   | 31.6   | 32.5   | 33.4   | 34.4   | 35.4   | 36.5   | 37.6   |
| Diethyl ether | 41.9   | 43.4   | 45.1   | 46.8   | 48.6   | 50.7   | 52.8   | 55.2   |
| THF           | 29.6   | 30.5   | 31.4   | 32.3   | 33.2   | 34.3   | 35.4   | 36.5   |
| Ethyl acetate | 34.6   | 35.4   | 36.4   | 37.3   | 38.2   | 39.3   | 40.3   | 41.4   |
| Acetone       | 32.8   | 33.8   | 34.8   | 35.8   | 36.9   | 38.1   | 39.3   | 40.5   |
| Acetonitrile  | 30.2   | 31.3   | 32.5   | 33.7   | 34.9   | 36.3   | 37.8   | 39.3   |
| Toluene       | 31.8   | 32.5   | 33.2   | 33.8   | 34.5   | 35.3   | 36.1   | 36.8   |
| Benzene       | 30.4   | 31.2   | 32.0   | 32.9   | 33.7   | 34.7   | 35.7   | 36.7   |
| Methanol      | 28.1   | 29.0   | 29.9   | 30.7   | 31.6   | 32.7   | 33.7   | 34.7   |
| Ethanol       | 30.5   | 31.4   | 32.4   | 33.3   | 34.3   | 35.4   | 36.5   | 37.6   |

|                           |        |        |        |        |        |        |        |        |
|---------------------------|--------|--------|--------|--------|--------|--------|--------|--------|
| Cyclohexane               | 33.4   | 34.3   | 35.2   | 36.1   | 37.1   | 38.1   | 39.2   | 40.3   |
| Trichloroethylene         | 37.5   | 38.3   | 39.2   | 40.1   | 40.9   | 41.9   | 42.9   | 43.9   |
| Tetrachloroethylene       | 32.4   | 33.0   | 33.7   | 34.3   | 35.0   | 35.7   | 36.4   | 37.2   |
| <b>Cellulose acrylate</b> |        |        |        |        |        |        |        |        |
| Solvents                  | 303.15 | 308.15 | 313.15 | 318.15 | 323.15 | 328.15 | 333.15 | 338.15 |
| n-Pentane                 | 32.2   | 33.5   | 35.1   | 36.2   | 38.0   | 39.7   | 41.5   | 43.4   |
| n-Hexane                  | 37.7   | 38.6   | 39.5   | 40.3   | 41.7   | 42.5   | 43.8   | 45.0   |
| n-Heptane                 | 43.5   | 44.0   | 44.7   | 44.8   | 45.2   | 46.4   | 46.8   | 47.4   |
| n-Octane                  | 48.9   | 49.0   | 49.4   | 49.1   | 49.1   | 49.9   | 49.8   | 49.9   |
| n-Nonane                  | 54.4   | 54.3   | 54.3   | 54.1   | 54.1   | 54.0   | 53.9   | 53.8   |
| CCl4                      | 30.3   | 30.9   | 31.6   | 32.0   | 32.9   | 33.7   | 34.4   | 35.2   |
| Nitromethane              | 16.1   | 17.4   | 18.7   | 19.8   | 21.5   | 22.9   | 24.5   | 26.2   |
| CH2 Cl2                   | 15.3   | 16.4   | 17.7   | 18.7   | 20.3   | 21.5   | 23.0   | 24.5   |
| Chloroform                | 21.9   | 22.9   | 23.9   | 24.6   | 25.9   | 27.0   | 28.1   | 29.3   |
| Diethyl ether             | 28.7   | 30.2   | 32.0   | 33.4   | 35.6   | 37.5   | 39.7   | 42.0   |
| THF                       | 16.3   | 17.5   | 18.7   | 19.7   | 21.2   | 22.4   | 23.8   | 25.2   |
| Ethyl acetate             | 23.5   | 24.5   | 25.7   | 26.5   | 27.9   | 29.0   | 30.2   | 31.5   |
| Acetone                   | 16.4   | 18.0   | 19.7   | 21.2   | 23.4   | 25.0   | 27.1   | 29.1   |
| Acetonitrile              | 16.7   | 18.7   | 20.8   | 22.7   | 25.4   | 27.5   | 30.1   | 32.8   |
| Toluene                   | 27.1   | 27.7   | 28.4   | 28.7   | 29.5   | 30.2   | 30.8   | 31.5   |
| Benzene                   | 22.8   | 23.7   | 24.6   | 25.2   | 26.4   | 27.3   | 28.3   | 29.3   |
| Methanol                  | 16.6   | 18.7   | 20.9   | 22.9   | 25.7   | 27.7   | 30.3   | 32.8   |
| Ethanol                   | 19.0   | 20.9   | 22.9   | 24.7   | 27.2   | 29.1   | 31.5   | 33.8   |
| Cyclohexane               | 28.3   | 29.0   | 29.9   | 30.5   | 31.5   | 32.5   | 33.4   | 34.3   |
| Trichloroethylene         | 27.5   | 28.5   | 29.5   | 30.2   | 31.5   | 32.5   | 33.6   | 34.7   |
| Tetrachloroethylene       | 31.5   | 31.9   | 32.4   | 32.6   | 33.2   | 33.7   | 34.1   | 34.6   |

**Table S5.** Values of London dispersive surface energy of polymer surfaces as a function of temperature

| T(K) | PLA | Cellulose acrylate |
|------|-----|--------------------|
|------|-----|--------------------|

|        |        |        |
|--------|--------|--------|
| 303.15 | 88.19  | 72.60  |
| 308.15 | 87.196 | 71.519 |
| 313.15 | 86.196 | 70.477 |
| 318.15 | 85.184 | 69.285 |
| 323.15 | 84.161 | 68.208 |
| 328.15 | 83.131 | 67.162 |
| 333.15 | 82.086 | 66.004 |
| 338.15 | 81.032 | 64.870 |
